# Supplementary material for: The L1014F Knockdown Resistance Mutation Is Not a Strong Correlate of Phenotypic Resistance to Pyrethroids in Florida Populations of Culex quinquefasciatus
Source: MDPI journal article supplement (doi:10.3390/insects15030197), 2024-03-15
Supplement: s1 [file s1]

**Table S1.** Sample specific information for collections and data used in this study

| Latitude | Longitude | County       | Location          | Collection Date          | Provider/<br>Data source <sup>1</sup> |
|----------|-----------|--------------|-------------------|--------------------------|---------------------------------------|
| --       | --        | Laboratory   | CMAVE Cxq         | Jul-20                   | Eva A. Buckner                        |
| 29.635   | -82.360   | Alachua      | CMAVE             | 9/9/2020                 | Alden Estep                           |
| 30.248   | -85.895   | Bay          | Conservation      | 8/12/2020                | Mike Riles                            |
| 30.233   | -85.878   | Bay          | Beach Parkway     | 8/12/2020                | Mike Riles                            |
| 25.992   | -80.246   | Broward      | Shalimar          | 11/4/2020                | Tamara Hamilton                       |
| 25.986   | -80.246   | Broward      | Tarpon            | 9/30/2020                | Tamara Hamilton                       |
| 26.014   | -80.291   | Broward      | Pembroke Pines    | 10/8/2020                | Tamara Hamilton                       |
| 26.035   | -80.177   | Broward      | Farragut          | 11/4/20, 3/24/21, 4/6/21 | Tamara Hamilton                       |
| 26.035   | -80.178   | Broward      | 34th Ave          | 11/4/20, 3/24/21         | Tamara Hamilton                       |
| 26.069   | -80.208   | Broward      | SR-7              | 3/24/2021                | Tamara Hamilton                       |
| 30.013   | -81.853   | Clay         | Middleburg        | 6/23/2020                | Alden Estep                           |
| 26.138   | -81.796   | Collier      | Cambier Park      | Jul-17                   | <b>Lucas et al 2020</b>               |
| 26.116   | -81.759   | Collier      | Sugden Park       | Jun-18                   | <b>Lucas et al 2020</b>               |
| 26.090   | -81.726   | Collier      | Naples Manor      | Jun-18                   | <b>Lucas et al 2020</b>               |
| 26.158   | -81.658   | Collier      | Landfill          | Aug-17                   | <b>Lucas et al 2020</b>               |
| 26.227   | -81.672   | Collier      | Big Cypress Elem. | Jul-17                   | <b>Lucas et al 2020</b>               |
| 26.210   | -81.546   | Collier      | Palmetto Elem.    | Jul-17                   | <b>Lucas et al 2020</b>               |
| 26.265   | -81.526   | Collier      | Sabal Palm Elem.  | Jun-18                   | <b>Lucas et al 2020</b>               |
| 30.531   | -87.307   | Escambia     | W 9 Mile Rd       | 4/11/2021                | Kaylyn Cullen                         |
| 30.539   | -87.283   | Escambia     | Lyman             | 3/29/2021                | Kaylyn Cullen                         |
| 30.546   | -87.308   | Escambia     | Amanda            | 4/8/2021                 | Kaylyn Cullen                         |
| 28.493   | -82.555   | Hernando     | Spring Hill       | 1/9/2020                 | S. Fisher-Grainger                    |
| 28.031   | -82.125   | Hillsborough | Oak Lawn Cemetery | 4/7/2021                 | Eva A. Buckner                        |
| 27.609   | -80.497   | Indian River | Farms WCD         | 9/27/2020                | Eva A. Buckner                        |
| 28.805   | -81.534   | Lake         | Mt. Plymouth      | 2021                     | Justin Walker                         |
| 26.673   | -81.932   | Lee          | Cape Coral        | 4/27/2020                | Kara Tyler Julian                     |
| 26.714   | -81.843   | Lee          | Bayshore          | 7/8/2020                 | Kara Tyler Julian                     |
| 26.642   | -81.862   | Lee          | Ft Myers          | 7/28/2020                | Kara Tyler Julian                     |
| 26.641   | -81.998   | Lee          | Bonefish Grill    | 3/22/2021                | Kara Tyler Julian                     |
| 26.675   | -81.795   | Lee          | Pine Ridge Condos | 3/19/2021                | Kara Tyler Julian                     |
| 26.614   | -81.608   | Lee          | LA Golf Course    | 10/30/2020               | Kara Tyler Julian                     |
| 26.457   | -82.050   | Lee          | Causey Ct         | 1/15/2021                | Kara Tyler Julian                     |
| 26.567   | -81.849   | Lee          | Corporate Park    | 2/10/2021                | Kara Tyler Julian                     |
| 26.605   | -81.959   | Lee          | Academy & Veteran | 2/22/2021                | Kara Tyler Julian                     |
| 26.352   | -81.796   | Lee          | Highland Woods    | 3/24/2021                | Kara Tyler Julian                     |
| 26.416   | -81.795   | Lee          | Shadow Wood       | 4/7/2021                 | Kara Tyler Julian                     |
| 26.370   | -81.801   | Lee          | Bernwood Drive    | 4/9/2021                 | Kara Tyler Julian                     |
| 26.682   | -81.805   | Lee          | Big Lots          | 4/14/2021                | Kara Tyler Julian                     |

|        |         |            |                    |                  |                 |
|--------|---------|------------|--------------------|------------------|-----------------|
| 25.517 | -80.493 | Miami-Dade | SW 268th St        | 9/29/2021        | Unlu et al 2024 |
| 25.896 | -80.126 | Miami-Dade | Park Dr            | 10/15/2020       | Unlu et al 2024 |
| 25.930 | -80.216 | Miami-Dade | NW 170th Terrace   | 9/29/2020        | Unlu et al 2024 |
| 25.862 | -80.313 | Miami-Dade | W 44th St          | 9/10/2020        | Unlu et al 2024 |
| 25.814 | -80.226 | Miami-Dade | NW 42nd St         | 9/11/2020        | Unlu et al 2024 |
| 25.834 | -80.129 | Miami-Dade | Alton Rd           | 10/14/2020       | Unlu et al 2024 |
| 25.446 | -80.456 | Miami-Dade | SE 24th Ct         | 9/29/20, 10/1/20 | Unlu et al 2024 |
| 25.968 | -80.214 | Miami-Dade | NW 7th Ave         | 9/29/2020        | Unlu et al 2024 |
| 25.636 | -80.372 | Miami-Dade | SW 110th Ave       | 2020             | Unlu et al 2024 |
| 25.637 | -80.294 | Miami-Dade | SW 144th St        | 8/21/20-9/2/20   | Unlu et al 2024 |
| 25.790 | -80.206 | Miami-Dade | NW 6th Pl          | 7/30/2020        | Unlu et al 2024 |
| 25.805 | -80.196 | Miami-Dade | NW 30th St         | 8/18/2020        | Unlu et al 2024 |
| 25.853 | -80.131 | Miami-Dade | Bay Dr             | 8/12/20, 8/13/20 | Unlu et al 2024 |
| 25.588 | -80.313 | Miami-Dade | SW 193rd Lane      | 8/31/20-9/02/20  | Unlu et al 2024 |
| 25.754 | -80.337 | Miami-Dade | SW 87th Pl         | 9/8/20-9/9/20    | Unlu et al 2024 |
| 25.657 | -80.285 | Miami-Dade | Moss Ranch Rd      | 8/5/2020         | Unlu et al 2024 |
| 25.812 | -80.416 | Miami-Dade | NW 41st St         | 8/5/2021         | Unlu et al 2024 |
| 26.703 | -80.060 | Palm Beach | North St.          | 9/9/2020         | Steve Fazekas   |
| 26.932 | -80.118 | Palm Beach | Delaware           | 2/11/2020        | Steve Fazekas   |
| 26.882 | -80.144 | Palm Beach | Donald Ross Rd     | 2/9/2021         | Steve Fazekas   |
| 26.526 | -80.184 | Palm Beach | Boyton             | 3/16/2021        | Steve Fazekas   |
| 26.530 | -80.104 | Palm Beach | Old Boyton         | 4/7/2021         | Steve Fazekas   |
| 26.809 | -80.200 | Palm Beach | Ibis Reserve       | 3/16/2021        | Steve Fazekas   |
| 26.655 | -80.182 | Palm Beach | Lyons              | 3/23/2021        | Steve Fazekas   |
| 26.529 | -80.123 | Palm Beach | Military Trail     | 3/23/2021        | Steve Fazekas   |
| 26.660 | -80.265 | Palm Beach | New Castle         | 2/23/2021        | Steve Fazekas   |
| 26.654 | -80.221 | Palm Beach | Shower Tree        | 3/3/2021         | Steve Fazekas   |
| 26.608 | -80.107 | Palm Beach | Villas Santorini   | 2/17/21, 3/30/21 | Steve Fazekas   |
| 28.251 | -82.741 | Pasco      | Gulfside           | 4/8/2021         | Eva A. Buckner  |
| 28.223 | -82.722 | Pasco      | Creek Pub          | 4/8/2021         | Eva A. Buckner  |
| 28.245 | -82.736 | Pasco      | Seaforest          | 2020             | Agne Prasauskas |
| 28.214 | -82.719 | Pasco      | Mockingbird        | 2020             | Agne Prasauskas |
| 28.273 | -82.690 | Pasco      | Orchid Lake        | 2020             | Agne Prasauskas |
| 28.273 | -82.677 | Pasco      | Blueberry          | 2020             | Agne Prasauskas |
| 28.031 | -82.656 | Pinellas   | Oldsmar Sewer      | 7/6/2020         | Jason Stucke    |
| 28.113 | -82.767 | Pinellas   | North Hwy          | 7/6/2020         | Jason Stucke    |
| 27.847 | -82.672 | Pinellas   | Sawgrass Lake      | 7/6/2020         | Jason Stucke    |
| 27.975 | -82.765 | Pinellas   | Clearwater Nursery | 7/6/2020         | Jason Stucke    |
| 27.726 | -82.651 | Pinellas   | Lake Maggiore      | 7/6/2020         | Jason Stucke    |
| 27.829 | -82.748 | Pinellas   | Cross Bayou        | 7/6/2020         | Jason Stucke    |
| 28.152 | -82.663 | Pinellas   | Keller WTF         | 8/13/2020        | Jason Stucke    |
| 27.879 | -82.804 | Pinellas   | Walsingham Park    | 8/13/2020        | Jason Stucke    |
| 28.208 | -81.575 | Polk       | Davenport          | 2020             | Carl Boohene    |

|        |         |           |                |           |                  |
|--------|---------|-----------|----------------|-----------|------------------|
| 28.061 | -81.503 | Polk      | Kissimmee      | 2020      | Carl Boohene     |
| 27.895 | -81.473 | Polk      | Lake Wales     | 2020      | Carl Boohene     |
| 28.004 | -81.960 | Polk      | "E"            | 9/16/2020 | Carl Boohene     |
| 27.896 | -81.850 | Polk      | Tire Center    | 9/16/2020 | Jackson Mosley   |
| 29.657 | -81.446 | St. Johns | Light          | 9/9/2020  | Steven Peper     |
| 29.763 | -81.312 | St. Johns | 6520 US Hwy 1  | 9/9/2020  | Steven Peper     |
| 27.505 | -80.358 | St. Lucie | Fairwinds      | 6/15/2020 | Sandy Jackson    |
| 28.871 | -80.854 | Volusia   | S. County St.  | 9/9/2020  | Miranda Tressler |
| 30.385 | -86.351 | Walton    | San Destin     | 8/13/2020 | Cami Adams       |
| 30.321 | -86.141 | Walton    | Odessa         | 9/9/2020  | Cami Adams       |
| 30.320 | -86.135 | Walton    | Savannah St.   | 9/9/2020  | Cami Adams       |
| 30.337 | -86.165 | Walton    | MONETMONET2    | 9/9/2020  | Cami Adams       |
| 30.337 | -86.165 | Walton    | MONETMONET     | 8/13/2020 | Cami Adams       |
| 30.321 | -86.139 | Walton    | Seaside        | 8/13/2020 | Cami Adams       |
| 30.314 | -86.088 | Walton    | Seagrove Beach | 7/22/2020 | Cami Adams       |

---

<sup>1</sup> Samples from previous Florida *Culex quinquefasciatus* resistance studies included in analyses in this manuscript (Lucas et al 2020, Unlu et al 2023)
